# Supplementary material for: Brief communication: A framework to classify glaciers for water resource evaluation and management in the Southern Andes
Source: Copernicus journal article supplement (doi:10.5194/tc-16-1779-2022), 2022-05-10
Supplement: Supplementary file 1 [file tc-16-1779-2022-supplement.zip]

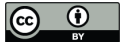

## *Supplement of*

# **Brief communication: A framework to classify glaciers for water resource evaluation and management in the Southern Andes**

**Nicole Schaffer and Shelley MacDonell**

*Correspondence to:* Nicole Schaffer ([nicole.schaffer@ceaza.cl](mailto:nicole.schaffer@ceaza.cl))

- [tc-16-1779-2022-supplement-title-page.pdf](#)
- SI
  - [Glacier examples\\_20220319.kmz](#)
  - [Inventory area reviewed.kmz](#)
  - [category examples\\_20220319.kmz](#)

The copyright of individual parts of the supplement might differ from the article licence.
