# Supplementary material for: Brief communication: A framework to classify glaciers for water resource evaluation and management in the Southern Andes
Source: Copernicus journal article supplement (doi:10.5194/tc-16-1779-2022), 2022-05-10
Supplement: Supplementary file 2 [file tc-16-1779-2022-supplement.zip]

Archive with 5 entries (4 files):
- tc-16-1779-2022-supplement-title-page.pdf
- SI/
- SI/Inventory area reviewed.kmz
- SI/Glacier examples_20220319.kmz
- SI/category examples_20220319.kmz
